# Supplementary material for: Drug Repurposing Based on Protozoan Proteome: In Vitro Evaluation of In Silico Screened Compounds against Toxoplasma gondii
Source: MDPI journal article supplement (doi:10.3390/pharmaceutics14081634), 2022-08-05
Supplement: s1 [file s1]

# Drug repurposing based on protozoan proteome: *In vitro* evaluation of *in silico* screened compounds against *Toxoplasma gondii*

Débora Chaves Cajazeiro<sup>1</sup>, Paula Pereira Marques Toledo<sup>1</sup>, Natália Ferreira de Sousa<sup>2</sup>, Marcus Tullius Scotti<sup>2</sup>, Juliana Quero Reimão<sup>1</sup>

<sup>1</sup> Departamento de Morfologia e Patologia Básica, Faculdade de Medicina de Jundiaí, Jundiaí, Brazil; dcajazeiro@gmail.com; marquestoledo.paula@gmail.com; julianareimao@g.fmj.br

<sup>2</sup> Programa de Pós-graduação em Produtos Naturais e Sintéticos Bioativos (PgPNSB), Instituto de Fármacos e Medicamentos (IPeFarm). Universidade Federal da Paraíba, Campus I, Cidade Universitária, João Pessoa PB 58.051-900, Brazil; nferreiradesousa.nfs@gmail.com; mtscotti@cca.ufpb.br

## 1. Probability calculations

**Supplementary Table S1.** RMSD values for the proteins selected in the study.

| Protein                                   | PDB binder                                                           | RMSD     |
|-------------------------------------------|----------------------------------------------------------------------|----------|
| Thymidylate synthase                      | 2-amino-5-(phenylsulfanyl)-3,9-dihydro-4H-pyrimido[4,5-b]indol-4-one | 0.6046   |
| Purine nucleoside phosphorylase           | 1,4-dideoxy-4-aza-1-(s)-(9-deazahypoxanthine-9-yl)-d-ribitol         | 0.2400   |
| enoyl acyl reductase carrier protein      | Triclosan                                                            | 0.1724   |
| Calcium dependent protein kinase 1 (CDKP) | 5-amino-1-tert-butyl-3-(quinolin-2-yl)-1H-pyrazole-4-carboxamide     | 0.6046   |
| ATPase ( <i>H. sapiens</i> )              | Thapsigargine                                                        | homology |
| ATPase ( <i>M. musculus</i> )             | Thapsigargine                                                        | homology |

**Supplementary Table S2.** Score values and probability of activity of the compounds under study on the enzyme thymidylate synthase.

| Compound          | Moldock Score   | (p) Moldock Score | Plants Score    | (p) Plants Score | Vina Score  | (p) Vina Score | (p) Enzyme    |
|-------------------|-----------------|-------------------|-----------------|------------------|-------------|----------------|---------------|
| Almitrine         | -121.305        | 0.8550            | -466.218        | 0.8374           | -5.9        | 0.8939         | 0.8621        |
| Bortezomib        | -128.076        | 0.9027            | -393.94         | 0.7076           | -5.8        | 0.8787         | 0.8297        |
| Digitoxin         | -117.229        | 0.8262            | -398.544        | 0.7159           | -4.1        | 0.6212         | 0.7211        |
| Digoxin           | <b>-141.875</b> | 1                 | -357.979        | 0.6430           | <b>-6.6</b> | 1              | 0.8810        |
| Doxorubicin       | -137.097        | 0.9663            | -494.219        | 0.8877           | -6.1        | 0.9242         | <b>0.9261</b> |
| Mycophenolic Acid | -100.335        | 0.7072            | -353.844        | 0.6356           | -5.2        | 0.7878         | 0.7102        |
| Ribavirin         | -88.615         | 0.6245            | -346.587        | 0.6225           | -5.8        | 0.8787         | 0.7086        |
| Valproic acid     | -50.5341        | 0.3561            | -137.455        | 0.2469           | -4.3        | 0.6515         | 0.4182        |
| Fludarabine       | -107.242        | 0.7558            | -431.579        | 0.7752           | -6.3        | 0.9545         | 0.8285        |
| Fusidic acid      | -133.48         | 0.9408            | -416.569        | 0.7483           | -6          | 0.9090         | 0.8660        |
| Levofloxacin      | -63.4513        | 0.4472            | -422.531        | 0.7590           | -5.7        | 0.8636         | 0.6899        |
| Lomefloxacin      | -83.5192        | 0.5886            | -394.68         | 0.7089           | -6.5        | 0.9848         | 0.7608        |
| Trimethoprim      | -67.8519        | 0.4782            | -363.451        | 0.6528           | -5          | 0.7575         | 0.6295        |
| PDB Ligand        | -87.1878        | 0.6145            | <b>-556.682</b> | 1                | -6.5        | 0.9848         | 0.8664        |

**Legend:** In bold are the best results.

**Supplementary Table S3.** Score values and probability of activity of the compounds under study on the enzyme purine nucleoside phosphorylase.

| Compound          | Moldock Score   | (p) Moldock Score | Plants Score    | (p) Plants Score | Vina Score  | (p) Vina Score | (p) Enzyme    |
|-------------------|-----------------|-------------------|-----------------|------------------|-------------|----------------|---------------|
| Almitrine         | -127.911        | 0.8382            | -432.123        | 0.7609           | -6.5        | 0.7386         | 0.7792        |
| Bortezomib        | -129.914        | 0.8513            | -393.727        | 0.6932           | <b>-8.8</b> | 1              | 0.8482        |
| Digitoxin         | -61.7236        | 0.4044            | -255.084        | 0.4491           | -6.8        | 0.7727         | 0.5421        |
| Digoxin           | 9.6641          | 0                 | -267.169        | 0.4704           | -6.5        | 0.7386         | 0.4030        |
| Doxorubicin       | -114.487        | 0.7502            | -411.35         | 0.7243           | -7.6        | 0.8636         | 0.7794        |
| Mycophenolic Acid | -112.401        | 0.7365            | -383.293        | 0.6749           | -7.8        | 0.8863         | 0.7659        |
| Ribavirin         | -130.377        | 0.8543            | -456.559        | 0.8039           | -7.4        | 0.8409         | 0.8330        |
| Valproic acid     | -69.7007        | 0.4567            | -159.358        | 0.2806           | -5.3        | 0.6022         | 0.4465        |
| Fludarabine       | 36.2639         | 0                 | 119.305         | 0                | <b>-8.8</b> | 1              | 0.3333        |
| Fusidic acid      | -115.744        | 0.7584            | -383.261        | 0.6748           | -5.1        | 0.5795         | 0.6709        |
| Levofloxacin      | -84.637         | 0.5546            | -423.041        | 0.7449           | -8.4        | 0.9545         | 0.7513        |
| Lomefloxacin      | -87.4131        | 0.5728            | -390.42         | 0.6874           | -8.5        | 0.9659         | 0.7420        |
| Trimethoprim      | -118.061        | 0.7736            | -433.763        | 0.7637           | -6.8        | 0.7727         | 0.7700        |
| PDB Ligand        | <b>-152.601</b> | 1                 | <b>-567.905</b> | 1                | -7.6        | 0.8636         | <b>0.9545</b> |

**Legend:** In bold are the best results.

**Supplementary Table S4.** Score values and probability of activity of the compounds under study on the enzyme enoyl-acyl carrier protein reductase.

| Compound          | Moldock<br>Score | (p) Moldock<br>Score | Plants<br>Score | (p) Plants<br>Score | Vina<br>Score | (p) Vina<br>Score | (p)<br>Enzyme |
|-------------------|------------------|----------------------|-----------------|---------------------|---------------|-------------------|---------------|
| Almitrine         | -151.561         | 0.9670               | <b>-567.128</b> | 1                   | -9.7          | 0.8584            | <b>0.9418</b> |
| Bortezomib        | <b>-156.727</b>  | 1                    | -469.468        | 0.8277              | -9            | 0.7964            | 0.8747        |
| Digitoxin         | -131.453         | 0.8387               | -431.832        | 0.7614              | -10.9         | 0.9646            | 0.8549        |
| Digoxin           | -99.8765         | 0.6372               | -485.386        | 0.8558              | <b>-11.3</b>  | 1                 | 0.8310        |
| Doxorubicin       | -129.296         | 0.8249               | -559.333        | 0.9862              | -10.1         | 0.8938            | 0.9016        |
| Mycophenolic Acid | -91.8875         | 0.5862               | -419.221        | 0.7392              | -8.6          | 0.7610            | 0.6955        |
| Ribavirin         | -78.9661         | 0.5038               | -473.045        | 0.8341              | -6.8          | 0.6017            | 0.6465        |
| Valproic acid     | -47.3616         | 0.3021               | -182.668        | 0.3220              | -5.4          | 0.4778            | 0.3673        |
| Fludarabine       | -110.798         | 0.7069               | -70.4961        | 0.1243              | -7.9          | 0.6991            | 0.5101        |
| Fusidic acid      | -108.192         | 0.6903               | -480.38         | 0.8470              | -9            | 0.7964            | 0.7779        |
| Levofloxacin      | -64.011          | 0.4084               | -561.311        | 0.9897              | -9.9          | 0.8761            | 0.7580        |
| Lomefloxacin      | -74.5413         | 0.4756               | -529.004        | 0.9327              | -9            | 0.7964            | 0.7349        |
| Trimethoprim      | -68.9302         | 0.4398               | -505.728        | 0.8917              | -7.6          | 0.6725            | 0.6680        |
| PDB Ligand        | -95.7978         | 0.6112               | -558.059        | 0.9840              | -8.2          | 0.7256            | 0.7736        |

**Legend:** In bold are the best results.

**Supplementary Table S4.** Score values and probability of activity of the compounds under study on the enzyme calcium dependent protein kinase 1.

| Compound          | Moldock<br>Score | (p) Moldock<br>Score | Plants<br>Score | (p) Plants<br>Score | Vina<br>Score | (p) Vina<br>Score | (p)<br>Enzyme |
|-------------------|------------------|----------------------|-----------------|---------------------|---------------|-------------------|---------------|
| Almitrine         | -98.5143         | 0.7437               | -446.347        | 0.7790              | -8.2          | 0.8817            | 0.8014        |
| Bortezomib        | -125.787         | 0.9496               | -363.957        | 0.6352              | -7.6          | 0.8172            | 0.8006        |
| Digitoxin         | -103.47          | 0.7811               | -371.161        | 0.6478              | <b>-9.3</b>   | 1                 | 0.8096        |
| Digoxin           | <b>-132.462</b>  | 1                    | -426.354        | 0.7441              | -9.3          | 1                 | 0.9147        |
| Doxorubicin       | -119.472         | 0.9019               | -490.765        | 0.8565              | -9.3          | 1                 | <b>0.9195</b> |
| Mycophenolic Acid | -103.988         | 0.7850               | -338.773        | 0.5912              | -7.6          | 0.8172            | 0.7311        |
| Ribavirin         | -114.186         | 0.8620               | -393.585        | 0.6869              | -6.3          | 0.6774            | 0.7421        |
| Valproic acid     | -58.5146         | 0.4417               | -152.754        | 0.2666              | -4.7          | 0.5053            | 0.4045        |
| Fludarabine       | -93.8672         | 0.7086               | -62.72          | 0.1094              | -7.2          | 0.7741            | 0.5307        |
| Fusidic acid      | -81.9682         | 0.6188               | -326.436        | 0.5697              | -8.3          | 0.8924            | 0.6936        |
| Levofloxacin      | -80.4464         | 0.6073               | -492.291        | 0.8592              | -8.8          | 0.9462            | 0.8042        |
| Lomefloxacin      | -93.0443         | 0.7024               | -473.9          | 0.8271              | -7.9          | 0.8494            | 0.7930        |
| Trimethoprim      | -86.8336         | 0.6555               | -418.238        | 0.7299              | -7.4          | 0.7956            | 0.7270        |
| PDB Ligand        | -118.728         | 0.8963               | <b>-572.935</b> | 1                   | -7.3          | 0.7849            | 0.8937        |

**Legend:** In bold are the best results.

**Supplementary Table S5.** Score values and probability of activity of the compounds under study on the enzyme ATPase alpha 1 *H. sapiens*.

| Compound          | Moldock<br>Score | (p) Moldock<br>Score | Plants<br>Score | (p) Plants<br>Score | Vina<br>Score | (p) Vina<br>Score | (p)<br>Enzyme |
|-------------------|------------------|----------------------|-----------------|---------------------|---------------|-------------------|---------------|
| Almitrine         | -154.256         | 0.7706               | -356.979        | 0.8875              | -7.4          | 0.8505            | 0.8362        |
| Bortezomib        | -152.357         | 0.7611               | -359.366        | 0.8935              | -6.7          | 0.7701            | 0.8082        |
| Digitoxin         | <b>-200.169</b>  | 1                    | -371.178        | 0.9228              | <b>-8.7</b>   | 1                 | <b>0.9742</b> |
| Digoxin           | -186.023         | 0.9293               | -366.97         | 0.9124              | -8            | 0.9195            | 0.9204        |
| Doxorubicin       | -155.368         | 0.7761               | -383.296        | 0.9530              | -7.1          | 0.8160            | 0.8484        |
| Mycophenolic Acid | -124.786         | 0.6234               | -341.962        | 0.8502              | -6            | 0.6896            | 0.7211        |
| Ribavirin         | -110.893         | 0.5539               | -354.399        | 0.8811              | -5.8          | 0.6666            | 0.7006        |
| Valproic acid     | -69.8927         | 0.3491               | -128.88         | 0.3204              | -4.1          | 0.4712            | 0.3802        |
| Fludarabine       | -126.05          | 0.6297               | <b>-402.191</b> | 1                   | -6.1          | 0.7011            | 0.7769        |
| Fusidic acid      | -194.699         | 0.9726               | -378.944        | 0.9421              | -7.4          | 0.8505            | 0.9218        |
| Levofloxacin      | -106.831         | 0.5337               | -382.294        | 0.9505              | -6.6          | 0.7586            | 0.7476        |
| Lomefloxacin      | -115.423         | 0.5766               | -332.13         | 0.8258              | -6.7          | 0.7701            | 0.7241        |
| Trimethoprim      | -109.954         | 0.5493               | -333.977        | 0.8303              | -5.8          | 0.6666            | 0.6821        |
| PDB Ligand        | -199.549         | 0.9969               | -290.504        | 0.7223              | -6.3          | 0.7241            | 0.8144        |

**Legend:** In bold are the best results.

**Supplementary Table S6.** Score values and probability of activity of the compounds under study on the enzyme ATPase alpha 1 *M. musculus*.

| Compound          | Moldock<br>Score | (p) Moldock<br>Score | Plants<br>Score | (p) Plants<br>Score | Vina<br>Score | (p) Vina<br>Score | (p) Enzyme    |
|-------------------|------------------|----------------------|-----------------|---------------------|---------------|-------------------|---------------|
| Almitrine         | -144.571         | 0.9319               | <b>-80.513</b>  | 1                   | -5.8          | 0.9206            | <b>0.9508</b> |
| Bortezomib        | -123.144         | 0.7938               | -64.5417        | 0.8016              | -5.2          | 0.8253            | 0.8069        |
| Digitoxin         | -152.143         | 0.9807               | -45.7731        | 0.5685              | 2.2           | 0                 | 0.5164        |
| Digoxin           | -138.322         | 0.8916               | -43.4735        | 0.5399              | 3.4           | 0                 | 0.4772        |
| Doxorubicin       | -133.979         | 0.8636               | -68.7803        | 0.8542              | <b>-6.3</b>   | 1                 | 0.9059        |
| Mycophenolic Acid | -111.742         | 0.7203               | -51.6456        | 0.6414              | -5.3          | 0.8412            | 0.7343        |
| Ribavirin         | -113.073         | 0.7288               | -52.2021        | 0.6483              | -6.1          | 0.9682            | 0.7818        |
| Valproic acid     | -78.1745         | 0.5039               | -52.9495        | 0.6576              | -4.8          | 0.7619            | 0.6411        |
| Fludarabine       | -123.078         | 0.7933               | -56.5048        | 0.7018              | -6.1          | 0.9682            | 0.8211        |
| Fusidic acid      | -124.063         | 0.7997               | -57.2673        | 0.7112              | -5.4          | 0.8571            | 0.7893        |
| Levofloxacin      | -91.3501         | 0.5888               | -48.9165        | 0.6075              | -6.1          | 0.9682            | 0.7215        |
| Lomefloxacin      | -105.194         | 0.6781               | -61.2292        | 0.7604              | -6.1          | 0.9682            | 0.8022        |
| Trimethoprim      | -93.9306         | 0.6055               | -39.1169        | 0.4858              | -5.3          | 0.8412            | 0.6442        |
| PDB Ligand        | <b>-155.129</b>  | 1                    | -45.219         | 0.5616              | -4.4          | 0.6984            | 0.7533        |

**Legend:** In bold are the best results.

---

## 2. Alignment of target sequences

Protein sequence alignment is a tool that helps to verify the similarity and identity of the same protein from different species, or different proteins from the same species. By using this technique, it is possible to analyze the conserved regions and identify common residues of the active site. Furthermore, it is possible to point out structural differences and similarities that can contribute to drug development. Thus, we investigated the amino acids shared between the sequences of the target proteins and the template proteins.

The Na<sup>+</sup>/K<sup>+</sup>-transporting ATPase alpha 1 for *H. sapiens* showed a 98.33% identity with the Na<sup>+</sup>/K<sup>+</sup>-ATPase in the Na<sup>+</sup>-bound state of *Sus scrofa* (**Supplementary Figure S1**). While the Na<sup>+</sup>/K<sup>+</sup>-transporting ATPase alpha 1 for *M. musculus* showed a 97.06% identity with Na<sup>+</sup>/K<sup>+</sup>-ATPase for *Bos taurus* (**Supplementary Figure S2**). The alignment results showed that the target protein sequences contained a high degree of identity and similarity, which allowed the construction of reliable homology models of these proteins.

|   |                                                                |      |
|---|----------------------------------------------------------------|------|
| 1 | MGKGVGRDKYEPAAVSEQGDKKGKKGKDRDMDELKKEVSMDDHKLSDLDELHRKYGTDLS   | 60   |
| 2 | MGKGVGRDKYEPAAVSEHGDKK--KAKKERDMDELKKEVSMDDHKLSDLDELHRKYGTDLS  | 58   |
| 1 | RGLTSARAAILARDGPNALTPPPTTPEWIKFCRQLFGGFSMLLWIGAILCFLAYSIOAA    | 120  |
| 2 | RGLTPARAAILARDGPNALTPPPTTPEWVKFCRQLFGGFSMLLWIGAILCFLAYGIOAA    | 118  |
| 1 | TEEEPQNDNLYLGVVLSAVVIITGCFSSYYQEAQSSKIMESFKNMVPOQALVIRNGEKMSI  | 180  |
| 2 | TEEEPQNDNLYLGVVLSAVVIITGCFSSYYQEAQSSKIMESFKNMVPOQALVIRNGEKMSI  | 178  |
| 1 | NAEEVVVGDLVEVKGGRIPADLRISANGCKVDNSSLTGESEPOTRSPDFTNENPLETR     | 240  |
| 2 | NAEEVVVGDLVEVKGGRIPADLRISANGCKVDNSSLTGESEPOTRSPDFTNENPLETR     | 238  |
| 1 | NIAFFSTNCVEGTARGIVVYTGDRITVMGRIATLASGLEGGQTPIAAEIEHFHIIITGVAV  | 300  |
| 2 | NIAFFSTNCVEGTARGIVVYTGDRITVMGRIATLASGLEGGQTPIAAEIEHFHIIITGVAV  | 298  |
| 1 | FLGVSFFILSLILEYTWLEAVIFLIGIIVANVPEGLLATVTVCLTLTAKRMARKNCLVKN   | 360  |
| 2 | FLGVSFFILSLILEYTWLEAVIFLIGIIVANVPEGLLATVTVCLTLTAKRMARKNCLVKN   | 358  |
| 1 | LEAVETLGSTSTICSDKTGTLTQNRMTVAHMFNDQIHEADTTENQSGVSFDKTSATWLA    | 420  |
| 2 | LEAVETLGSTSTICSDKTGTLTQNRMTVAHMFNDQIHEADTTENQSGVSFDKTSATWLA    | 418  |
| 1 | LSRIAGLCNRAVFQANQENLPILKRAVAGDASESALLKCIELCCGSVKEMRERYAKIVEI   | 480  |
| 2 | LSRIAGLCNRAVFQANQENLPILKRAVAGDASESALLKCIELCCGSVKEMRERYTKIVEI   | 478  |
| 1 | PFNSTNKYQLSIHKNPNTSEPHLLVMKGAPERILDRCSILLHGKEQPLDEELKDAFQN     | 540  |
| 2 | PFNSTNKYQLSIHKNPNTAEPRHLLVMKGAPERILDRCSILLHGKEQPLDEELKDAFQN    | 538  |
| 1 | AYLELGGGLGERVLGFCHEFLPDEQFPEGQFQFDTDDVNFPIDNLCFVGLISMIDFPRAAVE | 600  |
| 2 | AYLELGGGLGERVLGFCHEFLPDEQFPEGQFQFDTDDVNFPIDNLCFVGLISMIDFPRAAVE | 598  |
| 1 | DAVGKCRSAGIKVIMVTGDHPITAKAIAGVGIISEGNETVEDIAARLNIPVSQVNPRDA    | 660  |
| 2 | DAVGKCRSAGIKVIMVTGDHPITAKAIAGVGIISEGNETVEDIAARLNIPVSQVNPRDA    | 658  |
| 1 | KACVVHGSDDLKDMTSEQLDDILKYHTEIVFARTSPQQKLIIVEGCQRQGAIVAVTGDGVN  | 720  |
| 2 | KACVVHGSDDLKDMTSEQLDDILKYHTEIVFARTSPQQKLIIVEGCQRQGAIVAVTGDGVN  | 718  |
| 1 | DSPALKKADIGVAMGIAGSDVSKQAADMILLDDNFASIVTGVEEGRILFDNLKKSIAAYTL  | 780  |
| 2 | DSPASKKADIGVAMGIAGSDVSKQAADMILLDDNFASIVTGVEEGRILFDNLKKSIAAYTL  | 778  |
| 1 | TSNIPEITPFLIFIIANIPPLGTVTILCIDLGTMVPAISLAYEQAESDIMKROPRNPK     | 840  |
| 2 | TSNIPEITPFLIFIIANIPPLGTVTILCIDLGTMVPAISLAYEQAESDIMKROPRNPK     | 838  |
| 1 | TDKLVNERLISMAYGOIGMIQALGGFFTYFVILAENGFLPIHLLGLRVWDWRWINDVED    | 900  |
| 2 | TDKLVNEQLISMAYGOIGMIQALGGFFTYFVILAENGFLPIHLLGLRVNWDRWINDVED    | 898  |
| 1 | SYGQQWTYEQRKIVEFTCHTAFFVSI VVVQWADLVICKTRRNSVFQQGMKNKILIFGLFE  | 960  |
| 2 | SYGQQWTYEQRKIVEFTCHTPEFVTI VVVQWADLVICKTRRNSVFQQGMKNKILIFGLFE  | 958  |
| 1 | ETALAAFLSYCPGMGVALRMYPLKPTWWFCAFPYSLLIFVYDEVKRLIIRRRPGGWVEKE   | 1020 |
| 2 | ETALAAFLSYCPGMGVALRMYPLKPTWWFCAFPYSLLIFVYDEVKRLIIRRRPGGWVEKE   | 1018 |
| 1 | YYY 1023                                                       |      |
| 2 | YYY 1021                                                       |      |

**Supplementary Figure S1.** Sequence alignment of *H. sapiens* Na<sup>+</sup>/K<sup>+</sup>-transporting ATPase alpha 1 (1) and Na<sup>+</sup>/K<sup>+</sup>-ATPase template in the Na<sup>+</sup>-bound stat of *S. scrofa* (2). Gray regions correspond to non-similar and non-identical amino acids. The red regions correspond only to identical amino acids. The yellow regions are similar amino acids.

|   |                                                                |      |
|---|----------------------------------------------------------------|------|
| 1 | MGKGVGRDKYEPAAVSEHGDKK                                         | 60   |
| 2 | MGKGVGRDKYEPAAVSEHGDKK--KAKKERDMDDELKKEVSMDDHKLSDDELHRKYGTDL   | 58   |
| 1 | RGLTPARAAEILARDGPNALTPPPTTPEWVKFCRQLFGGFSMLLWIGAILCFLAYGIRSA   | 120  |
| 2 | RGLTTARAAEILARDGPNALTPPPTTPEWVKFCRQLFGGFSMLLWIGAVLCFLAYGIQAA   | 118  |
| 1 | TEEEFPNDLLYLGVVLSAVVIITGCFSSYYQEAKSSKIMESFKNMVPPQALVIRNGEKMSI  | 180  |
| 2 | TEEEFPNDNLYLGVVLSAVVIITGCFSSYYQEAKSSKIMESFKNMVPPQALVIRNGEKMSI  | 178  |
| 1 | NAEDVVVGDLVEVKGGDRIPADLRISANGCKVDNSSLTGESEPQTRSPDFTNENPLETR    | 240  |
| 2 | NAEEVVVGDLVEVKGGDRIPADLRISANGCKVDNSSLTGESEPQTRSPDFTNENPLETR    | 238  |
| 1 | NIAFFSTNCVEGTARGIVVYTGDRITVMGRIATLASGLEGGQTPIAAEIEHFHILITGVAV  | 300  |
| 2 | NIAFFSTNCVEGTARGIVVYTGDRITVMGRIATLASGLEGGQTPIAAEIEHFHIIITGVAV  | 298  |
| 1 | FLGVSPFILSLILEXTWLEAVIFLIGIIVANVPEGLLATVTVCLTLTAKRMARKNCLVKN   | 360  |
| 2 | FLGVSPFILSLILEXTWLEAVIFLIGIIVANVPEGLLATVTVCLTLTAKRMARKNCLVKN   | 358  |
| 1 | LEAVETLGSTSTICSDKTGTLTQNRMTVAHMMWFDNQIHEADTTENQSGVSFDKTSATWFA  | 420  |
| 2 | LEAVETLGSTSTICSDKTGTLTQNRMTVAHMMWFDNQIHEADTTENQSGVSFDKTSATWLA  | 418  |
| 1 | LSRIAGLCNRAVFQANQENLPILKRAVAGDASESALLKCEVCCGSVMEMREKYSKIIVEI   | 480  |
| 2 | LSRIAGLCNRAVFQANQDNLPILKRAVAGDASESALLKCEVCCGSVKEMRERYTKIIVEI   | 478  |
| 1 | PFNSTNKYQLSIHKNFNASEFKHLLVMKGAPERILDRCSIIILHGKEQPLDEELKDAFQN   | 540  |
| 2 | PFNSTNKYQLSIHKNFNAGEPRHLLVMKGAPERILDRCSIIILHGKEQPLDEELKDAFQN   | 538  |
| 1 | AYLELGGGLGERVLGFCCHLLLPDEQFPEGFQFDTDDVNFPVDNLCFVGILSMIDPPRAAVE | 600  |
| 2 | AYLELGGGLGERVLGFCCHLLLPDEQFPEGFQFDTDDVNFPVDNLCFVGILSMIDPPRAAVE | 598  |
| 1 | DAVGKCRSAGIKVIMVTGDHPITAKAIAGKVGIISEGNETVEDIAARLNIPVQVNPRDA    | 660  |
| 2 | DAVGKCRSAGIKVIMVTGDHPITAKAIAGKVGIISEGNETVEDIAARLNIPVSQVNPRDA   | 658  |
| 1 | KACVVHGSDLKDMTSEELDDILRYHTEIVEFARTSPQOKLIIVEGCQRQGAIVAVTGDGVN  | 720  |
| 2 | RACVVHGSDLKDMTPEQLDDILRYHTEIVEFARTSPQOKLIIVEGCQRQGAIVAVTGDGVN  | 718  |
| 1 | DSPALKKADIGVAMGIVGSDVSKQAADMILLDDNFASIVTGVEEGRILFDNLKKSIAAYTL  | 780  |
| 2 | DSPALKKADIGVAMGIAGSDVSKQAADMILLDDNFASIVTGVEEGRILFDNLKKSIAAYTL  | 778  |
| 1 | TSNIPEITPFLIFIIANIPLPPLGTVTILCIDLGTDMVPAISLAYEQAESDIMKROPRNEK  | 840  |
| 2 | TSNIPEITPFLIFIIANIPLPPLGTVTILCIDLGTDMVPAISLAYEQAESDIMKROPRNEQ  | 838  |
| 1 | TDKLVNERLISMAYGQIGMIQALGGFFTYFVILAENGFLFHLGIRETWDDRWNVDVED     | 900  |
| 2 | TDKLVNERLISMAYGQIGMIQALGGFFTYFVIMAENGFLFNHLLGIRVTWDDRWINVDVED  | 898  |
| 1 | SYGQQWTYEQRKIVEFTCHTAFFVSIVVVQWADLVICKTRRNSVFQQGMKNKILIFGLFE   | 960  |
| 2 | SYGQQWTYEQRKIVEFTCHTAFFVSIVVVQWADLVICKTRRNSVFQQGMKNKILIFGLFE   | 958  |
| 1 | ETALAAFLSYCPGMAALRMYPLKPTWWFCAPPYSLIFVYDEVKRLIIIRRRPGGWVEKE    | 1020 |
| 2 | ETALAAFLSYCPGMAVALRMYPLKPTWWFCAPPYSLIFVYDEVKRLIIIRRRPGGWVEKE   | 1018 |
| 1 | TTY                                                            | 1023 |
| 2 | TTY                                                            | 1021 |

**Supplementary Figure S2.** Sequence alignment of the *M. musculus* Na<sup>+</sup>/K<sup>+</sup>-transporting ATPase alpha 1 (1) and the Na<sup>+</sup>/K<sup>+</sup>-ATPase from bovine template for *B. taurus* (2). Gray regions correspond to non-similar and non-identical amino acids. The red regions correspond only to identical amino acids. The yellow regions are similar amino acids.

### 3. Modeling by homology

The model for the Na<sup>+</sup>/K<sup>+</sup>-ATPase transporter (*H. sapiens*) and the Na<sup>+</sup>/K<sup>+</sup>-ATPase transporter (*M. musculus*) was generated by the homology modeling method. The reliability of the models was assessed using the Ramachandran plot, which plots all possible combinations of dihedral angles  $\Psi$  (psi) versus  $\phi$  (phi) for each amino acid in a protein, except glycine, which has no side chains, and the models are considered reliable when more than 90% of the amino acids are present in the allowed and/or favored regions (colored regions of the graph). The blank regions represent outliers, with poor contacts [1]. The Na<sup>+</sup>/K<sup>+</sup>-ATPase (*H. sapiens*) transporter model generated showed 91.3% amino acids in the favored regions and 7.5% in the allowed regions (**Supplementary Figure S3A**). While the Na<sup>+</sup>/K<sup>+</sup>-ATPase transporter model (*M. musculus*) showed 94.1% of amino acids in the favored regions and 5.7% in the allowed regions (**Supplementary Figure S3B**). Thus, in view of the results, the homology models were considered reliable.

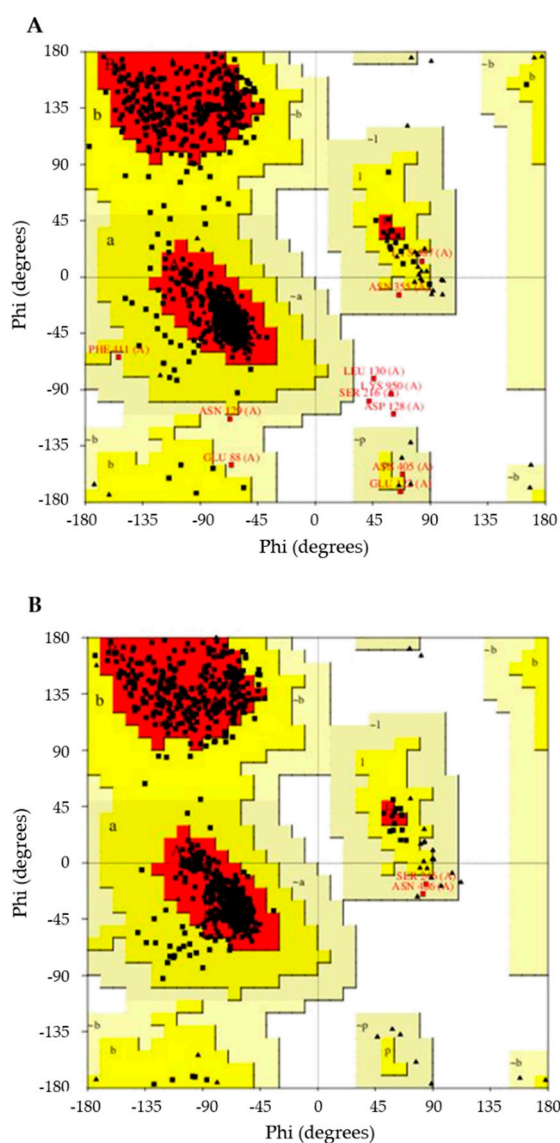

**Supplementary Figure S3.** Ramachandran plot of the homology model generated for Na<sup>+</sup>/K<sup>+</sup>-ATPase transporter (*H. sapiens*) (A) and Na<sup>+</sup>/K<sup>+</sup>-ATPase transporter (*M. musculus*) (B). The colored regions represent the allowed and favored regions of secondary structures and the white regions represent the forbidden regions.



#### 4. Molecular docking

The 13 compounds selected for *in vitro* evaluation were submitted to molecular docking screening with specific proteins to evaluate the inhibition of *T. gondii*, which correspond to: thymidyl synthase (PDB: 4KY4), essential for nucleotide synthesis in *T. gondii*; purine nucleoside phosphorylase (PDB: 3MB8), essential for the proliferation of the parasite; enoyl acyl reductase carrier protein (PDB: 2O2S), which aids in the synthesis of the parasite's fatty acid chains; and calcium dependent protein kinase 1 (PDB: 4M48), fundamental in the life cycle of the parasite, as it controls the exocytosis of micronemes, which are specialized organelles that contain various proteins involved in the invasion and egress of the parasite.

The docking results generated by the five scoring functions were validated by redocking the crystallographic ligand with all investigated proteins. The root mean square deviations (RMSDs) of the obtained fit poses were calculated in comparison with the crystal structure. RMSD values of less than 2 Å indicate an optimal degree of screening reliability. Information about the starting structures and redocking validation results is shown in **Supplementary Table S1**.

During the redocking analysis, most of the RMSD values were below 2.0 Å, that is, the generated poses correctly positioned the ligand at the active site. Overall, the programs provided values considered satisfactory for docking validation.

Docking results were generated using three scoring functions, and in addition, the probability of activity in each of the enzymes was calculated. The protein in which the compound obtained a probability higher than, or close to, the values obtained by the ligand in at least one scoring function was considered active. The results of the probability obtained by the four proteins are shown in **Supplementary Table S8**.

**Supplementary Table S8.** Activity probability values analyzed in the four proteins selected in the study.

| Compound          | Thymidyl<br>synthase<br>(PDB: 4KY4) | Purine<br>Nucleoside<br>(PDB: 3MB8) | Enoyl Acyl<br>(PDB: 2O2S) | CDKP<br>(PDB: 4M48) | P<br>Total    |
|-------------------|-------------------------------------|-------------------------------------|---------------------------|---------------------|---------------|
| Almitrine         | 0.8621                              | 0.7792                              | <b>0.9418</b>             | 0.8014              | 0.8461        |
| Bortezomib        | 0.8297                              | 0.8482                              | 0.8747                    | 0.8006              | 0.8383        |
| Digitoxin         | 0.7211                              | 0.5421                              | 0.8549                    | 0.8096              | 0.7319        |
| Digoxin           | 0.8810                              | 0.4030                              | 0.8310                    | 0.9147              | 0.7574        |
| Doxorubicin       | <b>0.9261</b>                       | 0.7794                              | 0.9016                    | <b>0.9195</b>       | <b>0.8816</b> |
| Mycophenolic acid | 0.7102                              | 0.7659                              | 0.6955                    | 0.7311              | 0.7257        |
| Ribavirin         | 0.7086                              | 0.8330                              | 0.6465                    | 0.7421              | 0.7326        |
| Valproic acid     | 0.4182                              | 0.4465                              | 0.3673                    | 0.4045              | 0.4091        |
| Fludarabine       | 0.8285                              | 0.3333                              | 0.5101                    | 0.5307              | 0.5506        |
| Fusidic acid      | 0.8660                              | 0.6709                              | 0.7779                    | 0.6936              | 0.7521        |
| Levofloxacin      | 0.6899                              | 0.7513                              | 0.7580                    | 0.8042              | 0.7509        |
| Lomefloxacin      | 0.7608                              | 0.7420                              | 0.7349                    | 0.7930              | 0.7577        |
| Trimethoprim      | 0.6295                              | 0.7700                              | 0.6680                    | 0.7270              | 0.6986        |
| PDB Ligand        | 0.8664                              | <b>0.9545</b>                       | 0.7736                    | 0.8937              | 0.8721        |

**Legend:** In bold are the best results.

---

**Supplementary Table S8** demonstrates that, for the enzyme thymidylate synthase (PDB: 4KY4), two compounds presented a higher probability than the PDB ligand, namely digoxin ( $p=0.8810$ ) and doxorubicin ( $p=0.9261$ ), indicating a higher potency of these compounds for that target. Different to what happened in the first enzyme, for the macromolecule purine nucleoside phosphorylase (PDB: 3MB8), none of the compounds under study presented a higher probability than the ligand, which obtained a probability of 0.9545. The target enoyl acyl reductase carrier protein (PDB: 2O2S) proved to be the macromolecule with the highest affinity with the molecules under study, since it presented the highest number of compounds with higher probability values than the standard PDB ligand under study, totaling six compounds. The highest probability was obtained by almitrine ( $p=0.9418$ ), followed by doxorubicin ( $p=0.9016$ ), bortezomib ( $p=0.8747$ ), digitoxin ( $p=0.8549$ ), digoxin ( $p=0.8310$ ) and fusidic acid ( $p=0.7779$ ). The PDB ligand obtained a probability of 0.7736. For the enzyme and calcium dependent protein kinase 1 (PDB: 4M48), two molecules under study stood out as more potent, these corresponded to: digoxin ( $p=0.9147$ ) and doxorubicin ( $p=0.9195$ ), with the PDB ligand showing probability of 0.8913.

The determination of the individual probabilities of the enzymes made it possible to calculate the total probability (Total P), thus determining the compounds that could possibly be more active for *T. gondii*. The highest Total P obtained with the sum of all individual probabilities was obtained by the compound doxorubicin, corresponding to 0.8816, followed by the sum obtained by the PDB ligands (0.8721). In addition to the compound doxorubicin, the compounds that obtained probabilities greater than 0.80, which corresponded to values close to those obtained for the PDB ligands under study, corresponded to almitrine (0.8461) and bortezomib (0.8383).

The final mechanism comprised the evaluation of the affinity of the compounds under study with the target  $\text{Na}^+/\text{K}^+$ -ATPase. The study of this mechanism is important, since the electrochemical gradient of  $\text{Na}^+$  and  $\text{K}^+$  ions across the plasma membrane, established by the  $\text{Na}^+/\text{K}^+$ -ATPase or  $\text{Na}^+$  pump, is essential for the maintenance of cellular function. This macromolecule belongs to family II of P-type ATPases that transport abundant  $\text{Ca}^{2+}$  and  $\text{Na}^+$  ions in exchange for  $\text{H}^+$  or  $\text{K}^+$ . Structurally, the  $\text{Na}^+/\text{K}^+$ -ATPase pump is composed of a  $\alpha$ -catalytic subunit present in all P-type ATPases, in addition to a  $\beta$ -regulatory subunit, which is exclusive to Na/K and H/K ATPase [2]. The activity probabilities obtained by the compounds under study with the  $\text{Na}^+/\text{K}^+$ -ATPase for *H. sapiens* and *M. musculus* are shown in **Supplementary Table S9**.

**Supplementary Table S9.** Activity probability values analyzed in the ATPase alpha 1 transporter of *H. sapiens* and *M. musculus*.

| Compound          | ATPase<br>( <i>H. sapiens</i> ) | ATPase<br>( <i>M. musculus</i> ) | Total P       |
|-------------------|---------------------------------|----------------------------------|---------------|
| Almitrine         | 0.8362                          | <b>0.9508</b>                    | <b>0.8935</b> |
| Bortezomib        | 0.8082                          | 0.8069                           | 0.8076        |
| Digitoxin         | <b>0.9742</b>                   | 0.5164                           | 0.7453        |
| Digoxin           | 0.9204                          | 0.4772                           | 0.6988        |
| Doxorubicin       | 0.8484                          | 0.9059                           | 0.8772        |
| Mycophenolic acid | 0.7211                          | 0.7343                           | 0.7277        |
| Ribavirin         | 0.7006                          | 0.7818                           | 0.7412        |
| Valproic acid     | 0.3802                          | 0.6411                           | 0.5107        |
| Fludarabine       | 0.7769                          | 0.8211                           | 0.7990        |
| Fusidic acid      | 0.9218                          | 0.7893                           | 0.8556        |
| Levofloxacin      | 0.7476                          | 0.7215                           | 0.7345        |
| Lomefloxacin      | 0.7241                          | 0.8022                           | 0.7632        |
| Trimethoprim      | 0.6821                          | 0.6442                           | 0.6631        |
| Thapsigargin      | 0.8144                          | 0.7533                           | 0.7838        |

**Legend:** In bold are the best results.

According to **Supplementary Table S9**, it is possible to see that, for the ATPase alpha 1 *H. sapiens* transporter, five compounds were potentially more potent for this enzyme, these corresponding to: bortezomib (p=0.8082), almitrine (p=0.8362), doxorubicin (p=0.8484), digoxin (p=0.9204) and digitoxin, which corresponds to the highest probability compound (p=0.9742). The positive control tapsigargin had a probability of 0.8144. In a similar way to the transporter from the species *H. sapiens* to the species *M. musculus*, a significant amount of compounds showed affinity for this target, corresponding to seven compounds, with the highest probability obtained by almitrine (0.9508). The other compounds potentially active for this target were, respectively, doxorubicin (p=0.9059), fludarabine (p=0.8211), bortezomib (p=0.8069), lomefloxacin (p=0.8022), fusidic acid (p=0.7893) and ribavirin (p=0.7818 ). The positive control tapsigargin had a probability of 0.7533.

The compound almitrine presented a significant probability for the ATPase alpha 1 transporter (*H. sapiens*) equivalent to 0.8362. Furthermore, it was the most likely compound for the ATPase transporter (*M. musculus*) with p=0.9508, and presented the highest total probability resulting from the calculated mean for the two enzymes under study with a total of 0.8935. This demonstrates a potency and affinity of this compound for this macromolecule. The molecular coupling of almitrine with transporters for the species *M. musculus* can be seen in **Supplementary Figure S4**.

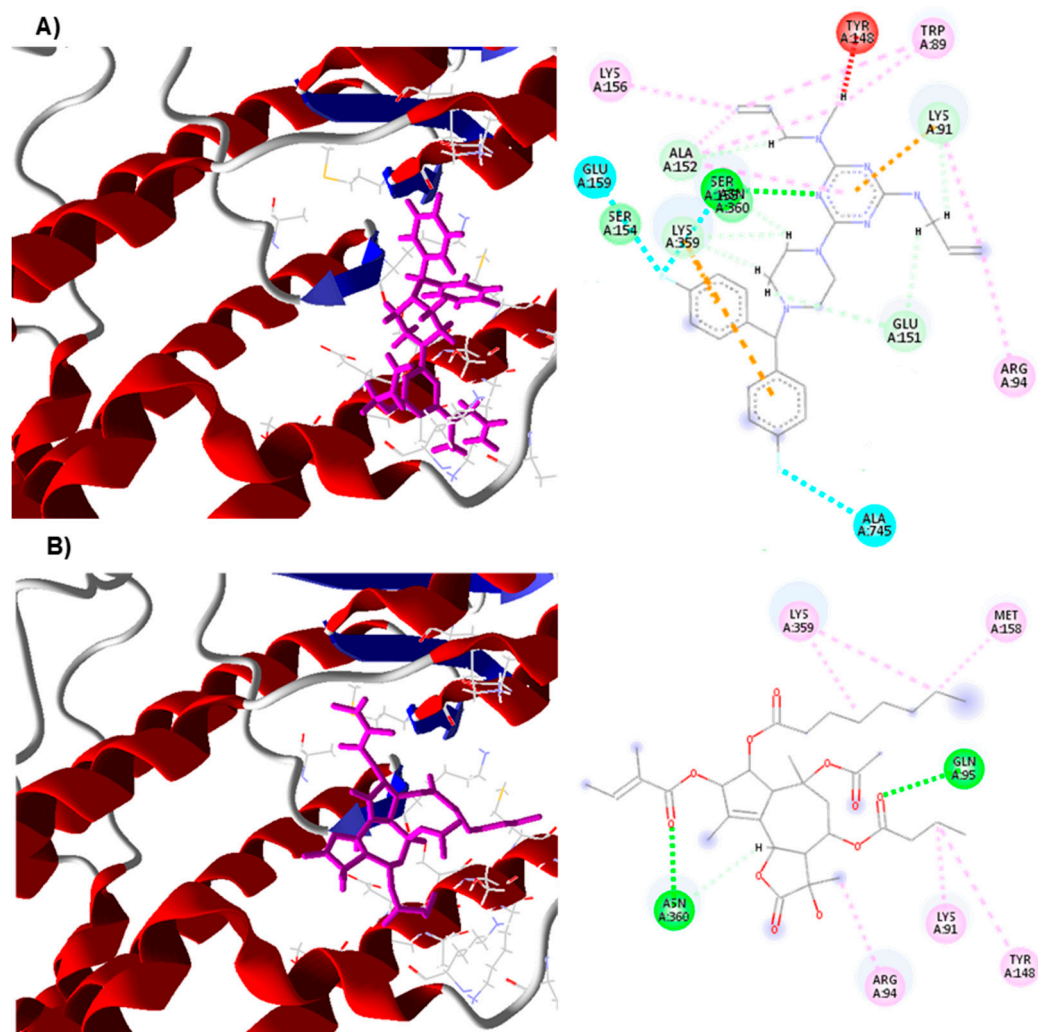

**Supplementary Figure S4.** Molecular coupling of almitrine (A) and the positive control tapsigargin (B) with the Na<sup>+</sup>/K<sup>+</sup>-transporting ATPase alpha 1 (*M. musculus*).

Legend: Green and blue (hydrogen interaction), pink (hydrophobic interaction), red and orange (steric interaction). Residues: Tyr (tyrosine), Trp (tryptophan), Lys (lysine), Glu (glutamic acid), Ala (alanine), Ser (serine), Met (methionine), Gln (glutamine), Asn (asparagine) and Arg (arginine).

The molecular coupling for the transporter referring to *M. musculus* demonstrated the occurrence of the three types of interactions, which correspond to steric interactions (red), hydrophobic interactions (pink) and hydrogen bonds (green and blue). Specifically for almitrine, this was the only one to present the three types of interactions, with the steric interaction being the one with the lowest occurrence, this being performed by residues Tyr 146 (one interaction), Lys 91 (one interaction) and Lys 359 (one interaction). The hydrophobic interactions occurred between the carbon atoms (C) of the compound structure and were established through the amino acids Lys 156 (one interaction), Ala 152 (three interactions), Trp 89 (two interactions), Lys 91 (one interaction) and Arg 94 (one interaction). The interactions of the hydrogen type were the most prevalent and were established through the atoms of fluorine (F), nitrogen (N) and hydrogen (H) of the structure of the compound under study, these being established through the residues Glu 151 (two interactions), Ala 745 (one interaction), Lys 359 (one interaction), Ser 155 (two interactions), Glu 159 (one interaction), Ala 152 (one interaction) and Lys 91 (one interaction).

Unlike almitrine, the positive control tapsigargin showed only hydrophobic interactions (pink) and hydrogen bonds (green). The hydrogen bonds occurred with the oxygen atoms (O) of the carbonyl group of the compound under study. The residues responsible for the interactions corresponded to Gln 95 (one interaction) and Asn 360 (two interactions). Hydrophobic interactions were the most prevalent and occurred through amino acids Met 158 (one interaction), Lys 359 (two interactions), Tyr 148 (one interaction), Lys 91 (one interaction) and Arg 94 (one interaction). The similarity between the residue Lys 91 occurred through a hydrophobic interaction established by the two compounds. **Supplementary Figure S5** demonstrates the molecular coupling of almitrine and the positive control tapsigargin with the transporter under study for the organism *H. sapiens*.

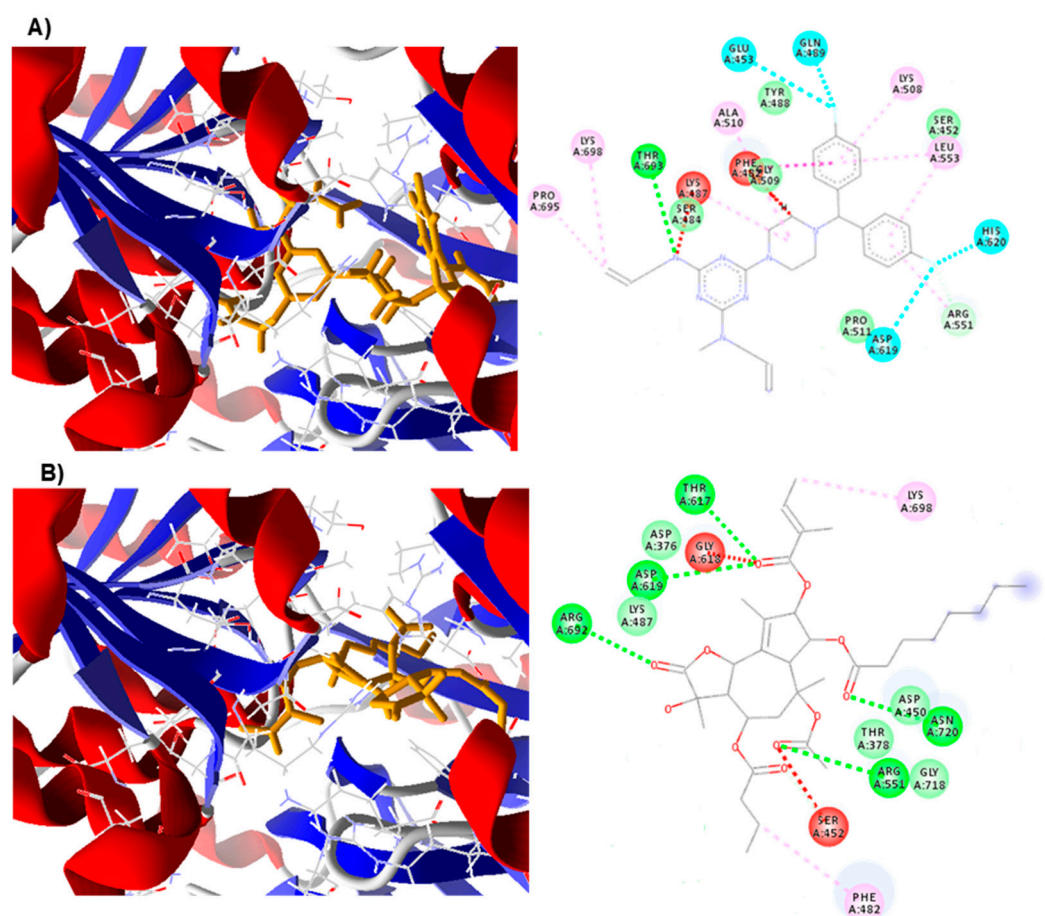

**Supplementary Figure S5.** Molecular coupling of almitrine (A) and the positive control tapsigargin (B) with the Na<sup>+</sup>/K<sup>+</sup>-transporting ATPase alpha 1 (*H. sapiens*).

Legend: Green and blue (hydrogen interaction), pink (hydrophobic interaction), red (steric interaction). Residues: Glu (glutamic acid), Gln (glutamine), Lys (lysine), Leu (leucine), His (histidine), Arg (arginine), Asp (aspartic acid), Pro (proline), Thr (threonine), Phe (phenylalanine), Ala (alanine), Gly (glycine), Asn (asparagine) and Ser (serine).

Molecular coupling with the Na<sup>+</sup>/K<sup>+</sup>-transporting ATPase alpha 1 for *H. sapiens* showed that the two compounds under study presented three types of interactions, namely, hydrogen interactions (green and blue), hydrophobic interactions (pink) and steric interactions (red). For almitrine, six interactions of hydrogen were observed, which were established with the atoms of hydrogen (H), fluorine (F) and nitrogen (N) of the structure of the compound under study. The residues involved were Thr 693 (one interaction), Glu 453 (one interaction), Gln 489 (one interaction), His 620 (one interaction), Arg 551 (one interaction) and Asp 619 (one interaction). The hydrophobic interactions

---

were established with the carbon atoms (C) of the aromatic rings and the branches, which were carried out by residues Lys 508 (one interaction), Leu 553 (two interactions), Arg 551 (one interaction), Pro 695 (one interaction), Lys 698 (one interaction), Lys 487 (one interaction), Phe 462 (two interactions) and Ala 510 (one interaction). The steric interactions were the least prevalent, being established with the nitrogen atom (N) of the amine group (NH) through the amino acid Lys 487 and with the hydrogen atom (H) of the aromatic ring through the residue Phe 462.

In the positive control taspargine, it was observed that the oxygen atoms (O) of the carbonyl groups of the existing organic ester functions were fundamental for the establishment of hydrogen bonds, which are formed by the amino acids Thr 617 (one interaction), Asp 619 (one interaction), Arg 692 (one interaction), Arg 551 (one interaction) and Asn 720 (one interaction). The carbonyl groups also established steric-like interactions through the amino acids Ser 452 (one interaction) and Gly 618 (one interaction). The hydrophobic interactions were established with the groups CH<sub>2</sub> and CH<sub>3</sub> through residues Lys 698 (one interaction) and Phe 482 (one interaction). Similar interactions occurred between almitrine and the positive control, which involved the hydrogen interactions of the Arg 551 and Asp 619 residues. In addition, they also coincided with regard to the residues of the hydrophobic interactions Phe 482 and Lys 698.

## References

1. Lovell, S. C.; Davis, I. W.; Arendall, W. B.; De Bakker, P. I. W.; Word, J. M.; Prisant, M. G.; Richardson, J. S.; Richardson, D. C. Structure Validation by  $\alpha$  Geometry:  $\varphi, \psi$  and  $C\beta$  Deviation. *Proteins Struct. Funct. Genet.* **2003**, 50 (3), 437–450. Available online: <https://doi.org/10.1002/prot.10286>.
2. Hilge, M.; Siegal, G.; Vuister, G. W.; Güntert, P.; Gloor, S. M.; Abrahams, J. P. ATP-Induced Conformational Changes of the Nucleotide-Binding Domain of Na, K-ATPase. *Nat. Struct. Mol. Biol.* **2003**, 10 (6), 468–474.
